# Supplementary material
Source: MDPI journal article supplement (https://www.mdpi.com/1424-8247/15/10/1207)

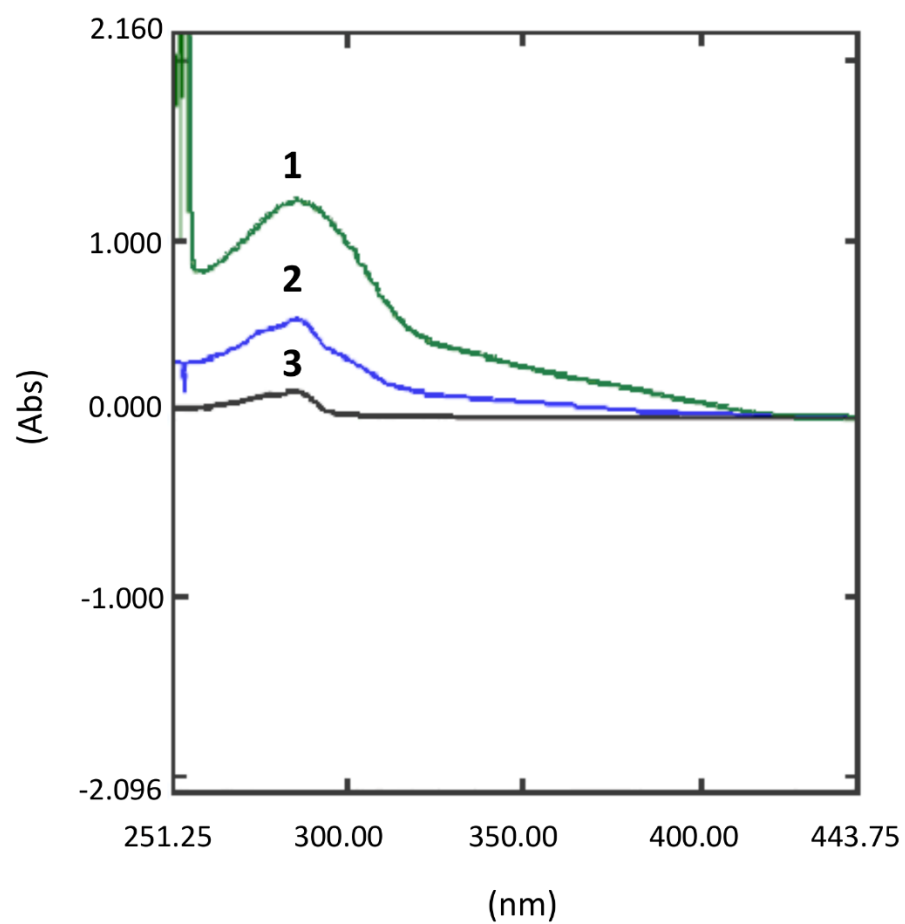

**Figure S1.** UV-Vis spectra of UA solution in DMSO (1), UA-PM (2), and PM (3), the concentration of UA was 5 mg/mL.

Supplement: s1 [file s1]
